# Supplementary material for: The costs of job loss and task usage: Do social tasks soften the drop?
Source: Springer Nature journal article supplement (doi:10.1007/s00181-024-02595-y), 2024-05-02
Supplement: MOESM1 [file 27056302]

## **Appendix A Tables and Figures**

Table A1: Task usage and subcomponents

| <b>(1) Manual tasks (= non-routine manual)</b>                  |                                    |                                                                                                                                                            |                                                                                                                                          |
|-----------------------------------------------------------------|------------------------------------|------------------------------------------------------------------------------------------------------------------------------------------------------------|------------------------------------------------------------------------------------------------------------------------------------------|
| Job hazards (vibrations)                                        | Q29a                               | Are you exposed at work to vibrations from hand tools, machinery, etc.                                                                                     | All of the time,                                                                                                                         |
| Posture-related issues (tiring positions)                       | Q30a                               | Does your main paid job involve tiring or painful positions                                                                                                | Almost all of the time,                                                                                                                  |
| Posture-related issues (heavy loads)                            | Q30c                               | Does your main paid job involve carrying or moving heavy loads                                                                                             | Around 3/4 of the time,                                                                                                                  |
| <b>(2) Routine tasks (= routine manual + routine cognitive)</b> |                                    |                                                                                                                                                            |                                                                                                                                          |
| Posture-related issues (repetitive movements)                   | Q30e                               | Does your main paid job involve repetitive hand or arm movements                                                                                           | Around 1/4 of the time,                                                                                                                  |
| Repetitive tasks (1 minute)                                     | Q48a                               | Does your job involve short repetitive tasks of less than 1 minute                                                                                         | Almost never, or Never                                                                                                                   |
| Repetitive tasks (10 minutes)                                   | Q48b                               | Does your job involve short repetitive tasks of less than 10 minutes                                                                                       |                                                                                                                                          |
| Constraints on pace of work                                     | Factors of pace (colleagues)       | Q50a                                                                                                                                                       | Is your pace of work dependent on the work done by colleagues                                                                            |
|                                                                 | Factors of pace (customer demands) | Q50b                                                                                                                                                       | Is your pace of work dependent on direct demands from people such as customers, passengers, pupils, patients, etc.                       |
| Factors of pace (production targets)                            | Q50c                               | Is your pace of work dependent on numerical production targets or performance targets                                                                      | Yes or No                                                                                                                                |
|                                                                 | Factors of pace (machine speed)    | Q50d                                                                                                                                                       | Is your pace of work dependent on automatic speed of a machine or movement of a product                                                  |
| Factors of pace (boss)                                          | Q50e                               | Is your pace of work dependent on the direct control of your boss                                                                                          |                                                                                                                                          |
| Cognitive dimensions (monotonous tasks)                         | Q53d                               | Generally, does your main paid job involve monotonous tasks                                                                                                |                                                                                                                                          |
| <b>(3) Abstract tasks (= nonroutine cognitive)</b>              |                                    |                                                                                                                                                            |                                                                                                                                          |
| Cognitive dimensions (self assess quality)                      | Q53b                               | Generally, does your main paid job involve assessing yourself the quality of your own work                                                                 |                                                                                                                                          |
| Cognitive dimensions (problem solving)                          | Q53c                               | Generally, does your main paid job involve solving unforeseen problems on your own                                                                         | Yes or No                                                                                                                                |
| Cognitive dimensions (complex tasks)                            | Q53e                               | Generally, does your main paid job involve complex tasks                                                                                                   |                                                                                                                                          |
| Cognitive dimensions (learning)                                 | Q53f                               | Generally, does your main paid job involve learning new things                                                                                             |                                                                                                                                          |
| Autonomy (apply own ideas)                                      | Q61i                               | You are able to apply your own ideas in your work                                                                                                          | Always, Most of the time, Sometimes, Rarely, or Never                                                                                    |
| <b>(4) Social skills</b>                                        |                                    |                                                                                                                                                            |                                                                                                                                          |
| Client work (dealing with people)                               | Q30f                               | Does your main paid job involve dealing directly with people who are not employees at your workplace such as customers, passengers, pupils, patients, etc. | All of the time, Almost all of the time, Around 3/4 of the time, Around half of the time, Around 1/4 of the time, Almost never, or Never |
| Working in a team                                               | Teamwork                           | Q58                                                                                                                                                        | Do you work in a group or team that has common tasks and can plan its work?                                                              |
|                                                                 | Team autonomy (task division)      | Q60a                                                                                                                                                       | For the team in which you work mostly, do the members decide by themselves on the division of tasks?                                     |
|                                                                 | Team autonomy (head)               | Q60b                                                                                                                                                       | For the team in which you work mostly, do the members decide by themselves who will be head of the team?                                 |
|                                                                 | Team autonomy (timetable)          | Q60c                                                                                                                                                       | For the team in which you work mostly, do the members decide by themselves the timetable of the work?                                    |

The variables are modified to take values between 0 to 1 as follows: 1 for All of the time and Always, 0.9 for Almost of all of the time, 0.75 for Around 3/4 of the time, 0.5 for Around half of the time, 0.25 for Around 1/4 of the time, 0.1 for Almost never, 0 for Never, 1 for Yes, 0 for No, 0.8 for Most of the time, 0.5 for Sometimes, and 0.2 for Rarely. The constraints on pace of work variable is defined as the average of the five modified component items. The working in a team variable is defined as the average of the four modified component items. Finally, we define the task variables as averages of the survey items, where the values of each item have been modified to have values between 0 and 1 as defined above.

**Table A2:** Industry by Displacement Status

|                                                                             | All           | Displaced     | Non-displaced |
|-----------------------------------------------------------------------------|---------------|---------------|---------------|
| D - Manufacturing                                                           | 37.64         | 38.18         | 37.10         |
| E - Electricity, gas, and water supply                                      | 0.18          | 0.15          | 0.20          |
| F - Construction                                                            | 5.57          | 5.37          | 5.78          |
| G - Wholesale and retail trade;<br>repair of motor vehicles and motorcycles | 13.25         | 13.16         | 13.35         |
| H - Hotels and restaurants                                                  | 1.60          | 1.49          | 1.72          |
| I - Transport, storage and communication                                    | 16.89         | 16.59         | 17.20         |
| J - Financial intermediation                                                | 0.78          | 0.79          | 0.76          |
| K - Real estate activities                                                  | 18.65         | 19.00         | 18.30         |
| L - Public administration and defence;<br>compulsory social security        | 0.05          | 0.05          | 0.06          |
| M - Education                                                               | 1.83          | 1.90          | 1.75          |
| N - Health and social work                                                  | 2.11          | 1.96          | 2.25          |
| O - Other service activities                                                | 1.44          | 1.35          | 1.53          |
| <b>Total</b>                                                                | <b>100.00</b> | <b>100.00</b> | <b>100.00</b> |

See Table 1 for table notes.

**Table A3:** Job Loss, Task Usage, and Employment

| Displacement dummy $\times$ time dummy interactions |                      |                      |                     |                     |                   |
|-----------------------------------------------------|----------------------|----------------------|---------------------|---------------------|-------------------|
| Time                                                | Displaced            | Routine task usage   | Social task usage   | Abstract task usage | Manual task usage |
| -5                                                  | -0.039**<br>(0.019)  | -0.012*<br>(0.006)   | -0.000<br>(0.005)   | -0.004<br>(0.007)   | 0.001<br>(0.008)  |
| -4                                                  | -0.002<br>(0.019)    | -0.007<br>(0.006)    | 0.004<br>(0.005)    | -0.009<br>(0.007)   | -0.003<br>(0.008) |
| -3                                                  | 0.003<br>(0.020)     | 0.000<br>(0.006)     | -0.000<br>(0.005)   | -0.001<br>(0.007)   | -0.000<br>(0.008) |
| -2                                                  | 0.002<br>(0.020)     | 0.000<br>(0.006)     | -0.000<br>(0.005)   | -0.000<br>(0.007)   | -0.000<br>(0.008) |
| 0                                                   | -0.002<br>(0.020)    | -0.000<br>(0.006)    | 0.000<br>(0.005)    | 0.000<br>(0.007)    | 0.000<br>(0.008)  |
| 1                                                   | -0.095***<br>(0.020) | -0.039***<br>(0.006) | 0.083***<br>(0.005) | 0.008<br>(0.007)    | 0.003<br>(0.008)  |
| 2                                                   | -0.077***<br>(0.020) | -0.037***<br>(0.006) | 0.054***<br>(0.005) | -0.001<br>(0.007)   | 0.013<br>(0.008)  |
| 3                                                   | -0.072***<br>(0.020) | -0.023***<br>(0.006) | 0.051***<br>(0.005) | -0.003<br>(0.007)   | 0.010<br>(0.008)  |
| 4                                                   | -0.033*<br>(0.020)   | -0.020***<br>(0.006) | 0.045***<br>(0.005) | 0.002<br>(0.007)    | 0.004<br>(0.008)  |
| 5                                                   | -0.069***<br>(0.020) | -0.008<br>(0.006)    | 0.031***<br>(0.005) | 0.004<br>(0.007)    | -0.011<br>(0.008) |
| 6                                                   | -0.067***<br>(0.020) | -0.007<br>(0.006)    | 0.030***<br>(0.005) | 0.009<br>(0.007)    | -0.007<br>(0.008) |
| 7                                                   | -0.050**<br>(0.020)  | -0.011*<br>(0.006)   | 0.020***<br>(0.005) | 0.010<br>(0.007)    | -0.009<br>(0.008) |
| 8                                                   | -0.069***<br>(0.020) | -0.006<br>(0.006)    | 0.017***<br>(0.005) | 0.008<br>(0.007)    | -0.004<br>(0.008) |
| 9                                                   | -0.086***<br>(0.020) | -0.001<br>(0.006)    | 0.019***<br>(0.005) | 0.005<br>(0.007)    | -0.001<br>(0.008) |
| 10                                                  | -0.110***<br>(0.020) | -0.005<br>(0.006)    | 0.015***<br>(0.005) | 0.003<br>(0.007)    | -0.004<br>(0.008) |
| Observations                                        |                      |                      |                     | 336,363             |                   |
| Number of worker-base-year combinations             |                      |                      |                     | 21,126              |                   |

Results from equation 1 for displacement dummy  $\times$  time dummy interactions and base year task usage interactions with the displacement dummy  $\times$  time dummy interactions. Standard errors in parentheses and clustered at the worker-base-year level. \*\*\*  $p < 0.01$ , \*\*  $p < 0.05$ , \*  $p < 0.1$ . Sample consists of workers who were 20-50 years old in base year (2004-06). The controls include time dummy  $\times$  base-year dummy interactions (not reported), other base year plant and worker characteristics interactions with displacement dummy  $\times$  time dummies (results shown in Tables A4 and A5), year dummies and age, and age squared (not reported).

**Table A4:** Job Loss, Worker and Plant Base Year Characteristics, and Employment

| Time                                    | Interactions with displacement dummy × time dummy interactions |                          |                      |                        |                       |                              |                                |                                 |                                  |                     |
|-----------------------------------------|----------------------------------------------------------------|--------------------------|----------------------|------------------------|-----------------------|------------------------------|--------------------------------|---------------------------------|----------------------------------|---------------------|
|                                         | Tenure<br>(centered)                                           | Experience<br>(centered) | Female               | Secondary<br>education | Tertiary<br>education | Plant size<br>-20<br>workers | Plant size<br>21-50<br>workers | Plant size<br>51-100<br>workers | Plant size<br>101-200<br>workers | Capital<br>region   |
| -5                                      | 0.030***<br>(0.001)                                            | 0.004***<br>(0.000)      | -0.033***<br>(0.007) | 0.031***<br>(0.009)    | 0.051***<br>(0.012)   | -0.023**<br>(0.011)          | -0.010<br>(0.010)              | -0.013<br>(0.011)               | -0.000<br>(0.011)                | 0.041***<br>(0.007) |
| -4                                      | 0.023***<br>(0.001)                                            | 0.002***<br>(0.000)      | -0.018**<br>(0.007)  | 0.005<br>(0.009)       | 0.018<br>(0.012)      | -0.018<br>(0.011)            | -0.018*<br>(0.010)             | -0.017<br>(0.011)               | -0.008<br>(0.011)                | 0.031***<br>(0.007) |
| -3                                      | -0.000<br>(0.001)                                              | -0.001**<br>(0.000)      | -0.001<br>(0.007)    | -0.003<br>(0.009)      | -0.008<br>(0.012)     | 0.000<br>(0.011)             | 0.000<br>(0.010)               | -0.000<br>(0.011)               | -0.000<br>(0.011)                | 0.000<br>(0.007)    |
| -2                                      | -0.000<br>(0.001)                                              | -0.000<br>(0.000)        | -0.000<br>(0.007)    | -0.002<br>(0.009)      | -0.004<br>(0.012)     | 0.000<br>(0.011)             | 0.000<br>(0.010)               | -0.000<br>(0.011)               | -0.000<br>(0.011)                | 0.000<br>(0.007)    |
| 0                                       | 0.000<br>(0.001)                                               | 0.000<br>(0.000)         | 0.000<br>(0.007)     | 0.002<br>(0.009)       | 0.004<br>(0.012)      | -0.000<br>(0.011)            | -0.000<br>(0.010)              | 0.000<br>(0.011)                | 0.000<br>(0.011)                 | -0.000<br>(0.007)   |
| 1                                       | -0.002*<br>(0.001)                                             | 0.001*<br>(0.000)        | -0.113***<br>(0.007) | 0.037***<br>(0.009)    | 0.050***<br>(0.012)   | 0.022**<br>(0.011)           | 0.072***<br>(0.010)            | 0.040***<br>(0.011)             | 0.077***<br>(0.011)              | 0.054***<br>(0.007) |
| 2                                       | 0.001<br>(0.001)                                               | 0.000<br>(0.000)         | -0.086***<br>(0.007) | 0.030***<br>(0.009)    | 0.063***<br>(0.012)   | 0.025**<br>(0.011)           | 0.036***<br>(0.010)            | 0.025**<br>(0.011)              | 0.035***<br>(0.011)              | 0.035***<br>(0.007) |
| 3                                       | 0.003**<br>(0.001)                                             | 0.001*<br>(0.000)        | -0.065***<br>(0.007) | 0.026***<br>(0.009)    | 0.057***<br>(0.012)   | 0.001<br>(0.011)             | 0.016<br>(0.010)               | 0.022**<br>(0.011)              | 0.007<br>(0.011)                 | 0.028***<br>(0.007) |
| 4                                       | 0.003**<br>(0.001)                                             | 0.001**<br>(0.000)       | -0.036***<br>(0.007) | 0.023**<br>(0.009)     | 0.050***<br>(0.012)   | -0.010<br>(0.011)            | 0.005<br>(0.010)               | -0.005<br>(0.011)               | -0.012<br>(0.011)                | 0.012<br>(0.007)    |
| 5                                       | 0.002*<br>(0.001)                                              | 0.001**<br>(0.000)       | -0.022***<br>(0.007) | 0.038***<br>(0.010)    | 0.069***<br>(0.012)   | 0.005<br>(0.011)             | 0.013<br>(0.010)               | 0.005<br>(0.011)                | 0.003<br>(0.011)                 | 0.019***<br>(0.007) |
| 6                                       | 0.003**<br>(0.001)                                             | 0.000<br>(0.000)         | -0.010<br>(0.007)    | 0.042***<br>(0.010)    | 0.074***<br>(0.012)   | 0.024**<br>(0.011)           | 0.019*<br>(0.010)              | 0.026**<br>(0.011)              | 0.016<br>(0.011)                 | 0.018**<br>(0.007)  |
| 7                                       | 0.002*<br>(0.001)                                              | 0.000<br>(0.000)         | -0.007<br>(0.007)    | 0.044***<br>(0.010)    | 0.074***<br>(0.012)   | 0.021*<br>(0.011)            | 0.028***<br>(0.010)            | 0.007<br>(0.011)                | 0.011<br>(0.011)                 | 0.006<br>(0.007)    |
| 8                                       | 0.006***<br>(0.001)                                            | 0.000<br>(0.000)         | 0.007<br>(0.007)     | 0.036***<br>(0.010)    | 0.069***<br>(0.012)   | 0.020*<br>(0.011)            | 0.015<br>(0.010)               | 0.023**<br>(0.011)              | 0.006<br>(0.011)                 | 0.009<br>(0.007)    |
| 9                                       | 0.008***<br>(0.001)                                            | -0.001**<br>(0.000)      | 0.004<br>(0.007)     | 0.040***<br>(0.010)    | 0.080***<br>(0.012)   | 0.035***<br>(0.011)          | 0.033***<br>(0.010)            | 0.019*<br>(0.011)               | 0.022**<br>(0.011)               | 0.001<br>(0.007)    |
| 10                                      | 0.005***<br>(0.001)                                            | -0.001***<br>(0.000)     | 0.009<br>(0.007)     | 0.055***<br>(0.010)    | 0.105***<br>(0.012)   | 0.044***<br>(0.011)          | 0.047***<br>(0.010)            | 0.045***<br>(0.011)             | 0.033***<br>(0.011)              | -0.005<br>(0.007)   |
| Observations                            |                                                                |                          |                      |                        |                       | 336,363                      |                                |                                 |                                  |                     |
| Number of worker-base-year combinations |                                                                |                          |                      |                        |                       | 21,126                       |                                |                                 |                                  |                     |

Results from equation 1 for base year worker and plant characteristics interactions with the displacement dummy × time dummy interactions. Standard errors in parentheses and clustered at the worker-base-year level. \*\*\* p<0.01, \*\* p<0.05, \* p<0.1. Sample consists of workers who were 20-50 years old in base year (2004-06). The controls include time dummy × base-year dummy interactions (not reported), other base year plant and worker characteristics interactions with displacement dummy × time dummies (results shown in Tables A3 and A5), year dummies and age, and age squared (not reported).

**Table A5:** Job Loss, Occupation, and Employment

| Interactions with displacement dummy $\times$ time dummy interactions |                     |                    |                                 |                          |                           |                                 |                             |
|-----------------------------------------------------------------------|---------------------|--------------------|---------------------------------|--------------------------|---------------------------|---------------------------------|-----------------------------|
| Time                                                                  | Managers            | Professionals      | Technicians and associate prof. | Clerical support workers | Service and sales workers | Craft and related trade workers | Plant and machine operators |
| -5                                                                    | 0.065**<br>(0.030)  | 0.062**<br>(0.026) | 0.043*<br>(0.024)               | 0.026<br>(0.022)         | 0.023<br>(0.022)          | 0.022<br>(0.021)                | 0.037***<br>(0.014)         |
| -4                                                                    | 0.040<br>(0.030)    | 0.040<br>(0.026)   | 0.024<br>(0.024)                | 0.020<br>(0.022)         | -0.011<br>(0.022)         | 0.008<br>(0.021)                | 0.003<br>(0.014)            |
| -3                                                                    | 0.001<br>(0.030)    | -0.000<br>(0.026)  | 0.001<br>(0.024)                | 0.002<br>(0.022)         | 0.002<br>(0.022)          | 0.001<br>(0.021)                | 0.000<br>(0.014)            |
| -2                                                                    | 0.000<br>(0.030)    | -0.000<br>(0.026)  | 0.000<br>(0.024)                | 0.001<br>(0.022)         | 0.001<br>(0.022)          | 0.000<br>(0.021)                | 0.000<br>(0.014)            |
| 0                                                                     | -0.000<br>(0.030)   | 0.000<br>(0.026)   | -0.000<br>(0.024)               | -0.001<br>(0.022)        | -0.001<br>(0.022)         | -0.000<br>(0.021)               | -0.000<br>(0.014)           |
| 1                                                                     | -0.074**<br>(0.030) | -0.003<br>(0.026)  | -0.079***<br>(0.024)            | -0.018<br>(0.022)        | -0.185***<br>(0.022)      | -0.114***<br>(0.021)            | -0.145***<br>(0.014)        |
| 2                                                                     | -0.035<br>(0.030)   | 0.028<br>(0.026)   | -0.027<br>(0.024)               | 0.007<br>(0.022)         | -0.100***<br>(0.022)      | -0.052**<br>(0.021)             | -0.070***<br>(0.014)        |
| 3                                                                     | -0.005<br>(0.030)   | 0.047*<br>(0.026)  | 0.010<br>(0.024)                | 0.042*<br>(0.022)        | -0.050**<br>(0.022)       | -0.048**<br>(0.021)             | -0.055***<br>(0.014)        |
| 4                                                                     | -0.016<br>(0.031)   | 0.033<br>(0.027)   | -0.014<br>(0.024)               | 0.012<br>(0.022)         | -0.082***<br>(0.022)      | -0.075***<br>(0.021)            | -0.051***<br>(0.014)        |
| 5                                                                     | -0.016<br>(0.031)   | 0.032<br>(0.027)   | -0.004<br>(0.024)               | 0.017<br>(0.022)         | -0.052**<br>(0.022)       | -0.041**<br>(0.021)             | -0.033**<br>(0.014)         |
| 6                                                                     | -0.028<br>(0.031)   | 0.001<br>(0.027)   | -0.025<br>(0.024)               | -0.018<br>(0.022)        | -0.081***<br>(0.022)      | -0.044**<br>(0.021)             | -0.041***<br>(0.014)        |
| 7                                                                     | -0.044<br>(0.031)   | -0.014<br>(0.027)  | -0.039<br>(0.024)               | -0.025<br>(0.022)        | -0.056**<br>(0.022)       | -0.050**<br>(0.021)             | -0.052***<br>(0.014)        |
| 8                                                                     | 0.007<br>(0.031)    | 0.023<br>(0.027)   | 0.000<br>(0.024)                | 0.001<br>(0.022)         | -0.025<br>(0.022)         | -0.043**<br>(0.021)             | -0.038***<br>(0.014)        |
| 9                                                                     | 0.009<br>(0.031)    | 0.042<br>(0.027)   | 0.012<br>(0.024)                | 0.005<br>(0.022)         | -0.030<br>(0.022)         | -0.045**<br>(0.021)             | -0.050***<br>(0.014)        |
| 10                                                                    | 0.009<br>(0.031)    | 0.023<br>(0.027)   | -0.000<br>(0.024)               | -0.008<br>(0.022)        | -0.045**<br>(0.022)       | -0.028<br>(0.021)               | -0.057***<br>(0.014)        |
| Observations                                                          |                     |                    |                                 |                          |                           |                                 | 336,363                     |
| Number of worker-base-year combinations                               |                     |                    |                                 |                          |                           |                                 | 21,126                      |

Results from equation 1 for base year occupation interactions with the displacement dummy  $\times$  time dummy interactions. Standard errors in parentheses and clustered at the worker-base-year level. \*\*\*  $p < 0.01$ , \*\*  $p < 0.05$ , \*  $p < 0.1$ . Sample consists of workers who were 20-50 years old in base year (2004-06). The controls include time dummy  $\times$  base-year dummy interactions (not reported), other base year plant and worker characteristics interactions with displacement dummy  $\times$  time dummies (results shown in Tables A4 and A3), year dummies and age, and age squared (not reported).

**Table A6:** Job Loss, Task Usage, and Relative Earnings

| Displacement dummy $\times$ time dummy interactions |                      |                      |                     |                     |                   |
|-----------------------------------------------------|----------------------|----------------------|---------------------|---------------------|-------------------|
| Time                                                | Displaced            | Routine task usage   | Social task usage   | Abstract task usage | Manual task usage |
| -5                                                  | -0.033***<br>(0.012) | -0.002<br>(0.004)    | -0.002<br>(0.003)   | -0.002<br>(0.004)   | -0.006<br>(0.005) |
| -4                                                  | -0.021*<br>(0.012)   | -0.001<br>(0.004)    | -0.000<br>(0.003)   | -0.001<br>(0.004)   | -0.006<br>(0.005) |
| -3                                                  | -0.015<br>(0.012)    | -0.000<br>(0.004)    | 0.002<br>(0.003)    | -0.001<br>(0.004)   | -0.001<br>(0.005) |
| -2                                                  | -0.014<br>(0.012)    | -0.001<br>(0.004)    | -0.000<br>(0.003)   | -0.001<br>(0.004)   | 0.001<br>(0.005)  |
| 0                                                   | -0.000<br>(0.012)    | -0.002<br>(0.004)    | 0.001<br>(0.003)    | 0.004<br>(0.004)    | 0.000<br>(0.005)  |
| 1                                                   | -0.013<br>(0.012)    | -0.006*<br>(0.004)   | 0.015***<br>(0.003) | 0.003<br>(0.004)    | 0.002<br>(0.005)  |
| 2                                                   | -0.041***<br>(0.012) | -0.017***<br>(0.004) | 0.033***<br>(0.003) | -0.002<br>(0.004)   | 0.003<br>(0.005)  |
| 3                                                   | -0.027**<br>(0.012)  | -0.016***<br>(0.004) | 0.028***<br>(0.003) | -0.004<br>(0.004)   | -0.004<br>(0.005) |
| 4                                                   | -0.017<br>(0.012)    | -0.013***<br>(0.004) | 0.031***<br>(0.003) | -0.001<br>(0.004)   | 0.003<br>(0.005)  |
| 5                                                   | -0.026**<br>(0.012)  | -0.014***<br>(0.004) | 0.030***<br>(0.003) | 0.001<br>(0.004)    | 0.001<br>(0.005)  |
| 6                                                   | -0.033***<br>(0.012) | -0.012***<br>(0.004) | 0.029***<br>(0.003) | -0.002<br>(0.004)   | -0.003<br>(0.005) |
| 7                                                   | -0.035***<br>(0.012) | -0.014***<br>(0.004) | 0.026***<br>(0.003) | -0.001<br>(0.004)   | 0.001<br>(0.005)  |
| 8                                                   | -0.049***<br>(0.012) | -0.013***<br>(0.004) | 0.025***<br>(0.003) | -0.001<br>(0.004)   | 0.003<br>(0.005)  |
| 9                                                   | -0.060***<br>(0.012) | -0.009**<br>(0.004)  | 0.019***<br>(0.003) | -0.000<br>(0.004)   | -0.003<br>(0.005) |
| 10                                                  | -0.061***<br>(0.012) | -0.007*<br>(0.004)   | 0.021***<br>(0.003) | 0.001<br>(0.004)    | -0.004<br>(0.005) |
| Observations                                        |                      |                      |                     | 336,363             |                   |
| Number of worker-base-year combinations             |                      |                      |                     | 21,126              |                   |

Results from equation 1 for displacement dummy  $\times$  time dummy interactions and base year task usage interactions with the displacement dummy  $\times$  time dummy interactions. Standard errors in parentheses and clustered at the worker-base-year level. \*\*\*  $p < 0.01$ , \*\*  $p < 0.05$ , \*  $p < 0.1$ . Sample consists of workers who were 20-50 years old in base year (2004-06). Earnings for those not employed in given year  $t$  are coded to be missing. The controls include time dummy  $\times$  base-year dummy interactions (not reported), other base year plant and worker characteristics interactions with displacement dummy  $\times$  time dummies (results shown in Tables A7 and A8), year dummies and age, and age squared (not reported).

**Table A7:** Job Loss, Worker and Plant Base Year Characteristics, and Relative Earnings

| Time                                    | Interactions with displacement dummy $\times$ time dummy interactions |                          |                      |                        |                       |                              |                                |                                 |                                  |                     |
|-----------------------------------------|-----------------------------------------------------------------------|--------------------------|----------------------|------------------------|-----------------------|------------------------------|--------------------------------|---------------------------------|----------------------------------|---------------------|
|                                         | Tenure<br>(centered)                                                  | Experience<br>(centered) | Female               | Secondary<br>education | Tertiary<br>education | Plant size<br>-20<br>workers | Plant size<br>21-50<br>workers | Plant size<br>51-100<br>workers | Plant size<br>101-200<br>workers | Capital<br>region   |
| -5                                      | 0.013***<br>(0.001)                                                   | 0.001***<br>(0.000)      | -0.008*<br>(0.004)   | 0.013**<br>(0.006)     | 0.027***<br>(0.007)   | 0.001<br>(0.007)             | 0.001<br>(0.006)               | 0.002<br>(0.007)                | 0.012**<br>(0.006)               | 0.019***<br>(0.004) |
| -4                                      | 0.011***<br>(0.001)                                                   | 0.001***<br>(0.000)      | -0.009**<br>(0.004)  | 0.011*<br>(0.006)      | 0.019***<br>(0.007)   | 0.007<br>(0.007)             | 0.002<br>(0.006)               | 0.003<br>(0.007)                | 0.014**<br>(0.006)               | 0.019***<br>(0.004) |
| -3                                      | 0.005***<br>(0.001)                                                   | 0.000<br>(0.000)         | -0.003<br>(0.004)    | 0.005<br>(0.006)       | 0.010<br>(0.007)      | 0.004<br>(0.007)             | 0.004<br>(0.006)               | 0.004<br>(0.007)                | 0.012*<br>(0.006)                | 0.008*<br>(0.004)   |
| -2                                      | 0.001<br>(0.001)                                                      | -0.000<br>(0.000)        | 0.003<br>(0.004)     | 0.001<br>(0.006)       | 0.003<br>(0.007)      | 0.002<br>(0.007)             | 0.002<br>(0.006)               | 0.002<br>(0.007)                | 0.007<br>(0.006)                 | 0.002<br>(0.004)    |
| 0                                       | 0.000<br>(0.001)                                                      | 0.000<br>(0.000)         | 0.002<br>(0.004)     | 0.000<br>(0.006)       | 0.002<br>(0.007)      | 0.003<br>(0.007)             | 0.002<br>(0.006)               | 0.008<br>(0.007)                | 0.004<br>(0.006)                 | 0.001<br>(0.004)    |
| 1                                       | 0.001<br>(0.001)                                                      | 0.000<br>(0.000)         | -0.012***<br>(0.004) | 0.009<br>(0.006)       | 0.015**<br>(0.007)    | -0.005<br>(0.007)            | -0.007<br>(0.006)              | 0.003<br>(0.007)                | 0.002<br>(0.006)                 | 0.007*<br>(0.004)   |
| 2                                       | -0.001<br>(0.001)                                                     | -0.000<br>(0.000)        | -0.035***<br>(0.004) | 0.015***<br>(0.006)    | 0.026***<br>(0.007)   | 0.020***<br>(0.007)          | 0.026***<br>(0.006)            | 0.022***<br>(0.007)             | 0.020***<br>(0.006)              | 0.018***<br>(0.004) |
| 3                                       | -0.000<br>(0.001)                                                     | -0.000<br>(0.000)        | -0.026***<br>(0.004) | 0.015***<br>(0.006)    | 0.028***<br>(0.007)   | 0.014**<br>(0.007)           | 0.013**<br>(0.006)             | 0.011*<br>(0.007)               | 0.007<br>(0.006)                 | 0.012***<br>(0.004) |
| 4                                       | -0.001<br>(0.001)                                                     | 0.000<br>(0.000)         | -0.013***<br>(0.004) | 0.014**<br>(0.006)     | 0.024***<br>(0.007)   | 0.015**<br>(0.007)           | 0.007<br>(0.006)               | 0.006<br>(0.007)                | -0.002<br>(0.006)                | 0.008*<br>(0.004)   |
| 5                                       | -0.000<br>(0.001)                                                     | 0.000<br>(0.000)         | -0.002<br>(0.004)    | 0.018***<br>(0.006)    | 0.027***<br>(0.007)   | 0.022***<br>(0.007)          | 0.016***<br>(0.006)            | 0.014**<br>(0.007)              | 0.006<br>(0.006)                 | 0.001<br>(0.004)    |
| 6                                       | -0.001<br>(0.001)                                                     | -0.000<br>(0.000)        | 0.006<br>(0.004)     | 0.023***<br>(0.006)    | 0.030***<br>(0.007)   | 0.019***<br>(0.007)          | 0.010*<br>(0.006)              | 0.013**<br>(0.007)              | 0.005<br>(0.006)                 | 0.002<br>(0.004)    |
| 7                                       | -0.000<br>(0.001)                                                     | -0.000<br>(0.000)        | 0.014***<br>(0.004)  | 0.027***<br>(0.006)    | 0.036***<br>(0.007)   | 0.023***<br>(0.007)          | 0.013**<br>(0.006)             | 0.014**<br>(0.007)              | 0.001<br>(0.006)                 | -0.001<br>(0.004)   |
| 8                                       | -0.000<br>(0.001)                                                     | -0.000<br>(0.000)        | 0.016***<br>(0.004)  | 0.028***<br>(0.006)    | 0.039***<br>(0.007)   | 0.025***<br>(0.007)          | 0.014**<br>(0.006)             | 0.016**<br>(0.007)              | 0.005<br>(0.006)                 | 0.003<br>(0.004)    |
| 9                                       | 0.001<br>(0.001)                                                      | -0.000*<br>(0.000)       | 0.016***<br>(0.004)  | 0.029***<br>(0.006)    | 0.045***<br>(0.007)   | 0.032***<br>(0.007)          | 0.023***<br>(0.006)            | 0.022***<br>(0.007)             | 0.011*<br>(0.006)                | -0.000<br>(0.004)   |
| 10                                      | 0.001*<br>(0.001)                                                     | -0.001**<br>(0.000)      | 0.017***<br>(0.004)  | 0.028***<br>(0.006)    | 0.053***<br>(0.007)   | 0.033***<br>(0.007)          | 0.027***<br>(0.006)            | 0.028***<br>(0.007)             | 0.017***<br>(0.006)              | -0.003<br>(0.004)   |
| Observations                            |                                                                       |                          |                      |                        |                       |                              | 336,363                        |                                 |                                  |                     |
| Number of worker-base-year combinations |                                                                       |                          |                      |                        |                       |                              | 21,126                         |                                 |                                  |                     |

Results from equation 1 for base year worker and plant characteristics time dummy displacement interactions. Standard errors in parentheses and clustered at the worker-base-year level. \*\*\* p $\leq$ 0.01, \*\* p $\leq$ 0.05, \* p $\leq$ 0.1. Sample consists of workers who were 20-50 years old in base year (2004-06). Earnings for those not employed in a given year  $t$  are coded to be missing. The controls include time dummy  $\times$  base-year dummy interactions (not reported), other base year plant and worker characteristics interactions with displacement dummy  $\times$  time dummies (results shown in Tables A6 and A8), year dummies and age, and age squared (not reported).



**Table A8:** Job Loss, Occupation, and Relative Earnings

| Interactions with displacement dummy $\times$ time dummy interactions |                      |                    |                                 |                          |                           |                                 |                             |
|-----------------------------------------------------------------------|----------------------|--------------------|---------------------------------|--------------------------|---------------------------|---------------------------------|-----------------------------|
| Time                                                                  | Managers             | Professionals      | Technicians and associate prof. | Clerical support workers | Service and sales workers | Craft and related trade workers | Plant and machine operators |
| -5                                                                    | 0.006<br>(0.018)     | 0.011<br>(0.016)   | 0.017<br>(0.014)                | 0.018<br>(0.013)         | 0.023*<br>(0.013)         | 0.036***<br>(0.012)             | 0.026***<br>(0.008)         |
| -4                                                                    | -0.009<br>(0.018)    | 0.006<br>(0.016)   | 0.005<br>(0.014)                | 0.008<br>(0.013)         | 0.011<br>(0.013)          | 0.019<br>(0.012)                | 0.011<br>(0.008)            |
| -3                                                                    | -0.007<br>(0.018)    | 0.010<br>(0.016)   | 0.002<br>(0.014)                | 0.013<br>(0.013)         | 0.001<br>(0.013)          | 0.014<br>(0.012)                | 0.009<br>(0.008)            |
| -2                                                                    | 0.005<br>(0.018)     | 0.008<br>(0.016)   | 0.006<br>(0.014)                | 0.013<br>(0.013)         | 0.011<br>(0.013)          | 0.013<br>(0.012)                | 0.014*<br>(0.008)           |
| 0                                                                     | -0.009<br>(0.018)    | -0.002<br>(0.016)  | -0.005<br>(0.014)               | -0.007<br>(0.013)        | -0.006<br>(0.013)         | -0.004<br>(0.012)               | 0.001<br>(0.008)            |
| 1                                                                     | -0.002<br>(0.018)    | 0.014<br>(0.016)   | 0.002<br>(0.014)                | 0.004<br>(0.013)         | -0.020<br>(0.013)         | -0.027**<br>(0.012)             | -0.003<br>(0.008)           |
| 2                                                                     | -0.036**<br>(0.018)  | 0.010<br>(0.016)   | -0.017<br>(0.014)               | -0.001<br>(0.013)        | -0.066***<br>(0.013)      | -0.049***<br>(0.012)            | -0.059***<br>(0.008)        |
| 3                                                                     | -0.040**<br>(0.018)  | 0.011<br>(0.016)   | -0.014<br>(0.014)               | 0.001<br>(0.013)         | -0.053***<br>(0.013)      | -0.050***<br>(0.012)            | -0.061***<br>(0.008)        |
| 4                                                                     | -0.049***<br>(0.018) | 0.017<br>(0.016)   | -0.012<br>(0.014)               | -0.003<br>(0.013)        | -0.069***<br>(0.013)      | -0.056***<br>(0.012)            | -0.061***<br>(0.008)        |
| 5                                                                     | -0.047***<br>(0.018) | 0.016<br>(0.016)   | -0.014<br>(0.014)               | -0.006<br>(0.013)        | -0.060***<br>(0.013)      | -0.061***<br>(0.012)            | -0.048***<br>(0.008)        |
| 6                                                                     | -0.045**<br>(0.018)  | 0.027*<br>(0.016)  | -0.011<br>(0.014)               | -0.007<br>(0.013)        | -0.048***<br>(0.013)      | -0.047***<br>(0.012)            | -0.041***<br>(0.008)        |
| 7                                                                     | -0.058***<br>(0.018) | 0.016<br>(0.016)   | -0.010<br>(0.014)               | -0.014<br>(0.013)        | -0.054***<br>(0.013)      | -0.050***<br>(0.012)            | -0.050***<br>(0.008)        |
| 8                                                                     | -0.048***<br>(0.018) | 0.032**<br>(0.016) | -0.000<br>(0.014)               | -0.003<br>(0.013)        | -0.036***<br>(0.013)      | -0.046***<br>(0.012)            | -0.042***<br>(0.008)        |
| 9                                                                     | -0.047**<br>(0.018)  | 0.030*<br>(0.016)  | 0.004<br>(0.014)                | 0.009<br>(0.013)         | -0.021<br>(0.013)         | -0.037***<br>(0.012)            | -0.044***<br>(0.008)        |
| 10                                                                    | -0.050***<br>(0.018) | 0.021<br>(0.016)   | -0.000<br>(0.014)               | -0.002<br>(0.013)        | -0.031**<br>(0.013)       | -0.038***<br>(0.012)            | -0.050***<br>(0.008)        |
| Observations                                                          |                      |                    |                                 |                          |                           |                                 | 336,363                     |
| Number of worker-base-year combinations                               |                      |                    |                                 |                          |                           |                                 | 21,126                      |

Results from equation 1 for base year occupation interactions with the displacement dummy  $\times$  time dummy interactions. Standard errors in parentheses and clustered at the worker-base-year level. \*\*\*  $p < 0.01$ , \*\*  $p < 0.05$ , \*  $p < 0.1$ . Sample consists of workers who were 20-50 years old in base year (2004-06). Earnings for those not employed in a given year  $t$  are coded to be missing. The controls include time dummy  $\times$  base-year dummy interactions (not reported), other base year plant and worker characteristics interactions with displacement dummy  $\times$  time dummies (results shown in Tables A7 and A6), year dummies and age, and age squared (not reported).

**Table A9:** Job Loss, Task Usage, and Employment for High- and Low-Tenure Workers

| Time | High-tenure workers (tenure $\geq 5$ years) |                                                     |                     |                     |                     | Low-tenure workers (tenure $< 5$ years) |                                                     |                     |                      |                    |
|------|---------------------------------------------|-----------------------------------------------------|---------------------|---------------------|---------------------|-----------------------------------------|-----------------------------------------------------|---------------------|----------------------|--------------------|
|      | Displaced                                   | Displacement dummy $\times$ time dummy interactions |                     |                     |                     | Displaced                               | Displacement dummy $\times$ time dummy interactions |                     |                      |                    |
|      |                                             | Routine task usage                                  | Social task usage   | Abstract task usage | Manual task usage   |                                         | Routine task usage                                  | Social task usage   | Abstract task usage  | Manual task usage  |
| -5   | 0.006<br>(0.024)                            | 0.000<br>(0.008)                                    | -0.000<br>(0.006)   | -0.001<br>(0.009)   | -0.000<br>(0.010)   | -0.372***<br>(0.049)                    | -0.030***<br>(0.010)                                | 0.019**<br>(0.009)  | -0.008<br>(0.010)    | 0.003<br>(0.014)   |
| -4   | 0.005<br>(0.024)                            | 0.000<br>(0.008)                                    | -0.000<br>(0.006)   | -0.001<br>(0.009)   | -0.000<br>(0.010)   | 0.694***<br>(0.049)                     | -0.017*<br>(0.010)                                  | 0.014<br>(0.009)    | -0.032***<br>(0.010) | -0.023*<br>(0.014) |
| -3   | 0.003<br>(0.024)                            | 0.000<br>(0.008)                                    | -0.000<br>(0.006)   | -0.000<br>(0.009)   | -0.000<br>(0.010)   | 0.003<br>(0.049)                        | 0.000<br>(0.010)                                    | -0.001<br>(0.009)   | -0.001<br>(0.010)    | 0.000<br>(0.014)   |
| -2   | 0.002<br>(0.024)                            | 0.000<br>(0.008)                                    | -0.000<br>(0.006)   | -0.000<br>(0.009)   | -0.000<br>(0.010)   | 0.002<br>(0.049)                        | 0.000<br>(0.010)                                    | -0.000<br>(0.009)   | -0.000<br>(0.010)    | 0.000<br>(0.014)   |
| 0    | -0.002<br>(0.024)                           | -0.000<br>(0.008)                                   | 0.000<br>(0.006)    | 0.000<br>(0.009)    | 0.000<br>(0.010)    | -0.002<br>(0.049)                       | -0.000<br>(0.010)                                   | 0.000<br>(0.009)    | 0.000<br>(0.010)     | -0.000<br>(0.014)  |
| 1    | -0.060**<br>(0.024)                         | -0.045***<br>(0.008)                                | 0.108***<br>(0.006) | 0.020**<br>(0.009)  | 0.001<br>(0.010)    | -0.137***<br>(0.049)                    | -0.027***<br>(0.010)                                | 0.044***<br>(0.009) | -0.001<br>(0.010)    | -0.006<br>(0.014)  |
| 2    | -0.048**<br>(0.024)                         | -0.035***<br>(0.008)                                | 0.069***<br>(0.006) | 0.008<br>(0.009)    | 0.014<br>(0.010)    | -0.132***<br>(0.049)                    | -0.036***<br>(0.010)                                | 0.035***<br>(0.009) | -0.008<br>(0.010)    | 0.003<br>(0.014)   |
| 3    | -0.039<br>(0.024)                           | -0.019**<br>(0.008)                                 | 0.067***<br>(0.006) | 0.008<br>(0.009)    | 0.011<br>(0.010)    | -0.122**<br>(0.049)                     | -0.025**<br>(0.010)                                 | 0.033***<br>(0.009) | -0.013<br>(0.010)    | 0.001<br>(0.014)   |
| 4    | -0.017<br>(0.024)                           | -0.018**<br>(0.008)                                 | 0.054***<br>(0.006) | 0.005<br>(0.009)    | -0.001<br>(0.010)   | -0.073<br>(0.049)                       | -0.023**<br>(0.010)                                 | 0.035***<br>(0.009) | 0.002<br>(0.010)     | 0.007<br>(0.014)   |
| 5    | -0.009<br>(0.024)                           | -0.005<br>(0.008)                                   | 0.039***<br>(0.006) | 0.022**<br>(0.009)  | -0.024**<br>(0.010) | -0.135***<br>(0.049)                    | -0.010<br>(0.010)                                   | 0.025***<br>(0.009) | -0.011<br>(0.010)    | -0.001<br>(0.014)  |
| 6    | -0.031<br>(0.024)                           | -0.005<br>(0.008)                                   | 0.036***<br>(0.006) | 0.014<br>(0.009)    | -0.012<br>(0.010)   | -0.099**<br>(0.049)                     | -0.007<br>(0.010)                                   | 0.026***<br>(0.009) | 0.001<br>(0.010)     | -0.006<br>(0.014)  |
| 7    | -0.016<br>(0.024)                           | 0.003<br>(0.008)                                    | 0.024***<br>(0.006) | 0.023**<br>(0.009)  | -0.015<br>(0.010)   | -0.079<br>(0.049)                       | -0.026***<br>(0.010)                                | 0.018**<br>(0.009)  | -0.004<br>(0.010)    | -0.005<br>(0.014)  |
| 8    | -0.036<br>(0.024)                           | 0.016**<br>(0.008)                                  | 0.016**<br>(0.006)  | 0.022**<br>(0.009)  | -0.018*<br>(0.010)  | -0.100**<br>(0.049)                     | -0.032***<br>(0.010)                                | 0.028***<br>(0.009) | -0.007<br>(0.010)    | 0.013<br>(0.014)   |
| 9    | -0.074***<br>(0.024)                        | 0.015*<br>(0.008)                                   | 0.015**<br>(0.006)  | 0.012<br>(0.009)    | -0.007<br>(0.010)   | -0.044<br>(0.049)                       | -0.016<br>(0.010)                                   | 0.031***<br>(0.009) | -0.004<br>(0.010)    | 0.005<br>(0.014)   |
| 10   | -0.117***<br>(0.024)                        | 0.008<br>(0.008)                                    | 0.014**<br>(0.006)  | 0.001<br>(0.009)    | -0.004<br>(0.010)   | -0.038<br>(0.049)                       | -0.020**<br>(0.010)                                 | 0.023**<br>(0.009)  | 0.000<br>(0.010)     | -0.004<br>(0.014)  |
|      | Observations                                |                                                     |                     |                     | 208,502             | Observations                            |                                                     |                     |                      | 127,861            |
|      | Number of worker-base-year combinations     |                                                     |                     |                     | 13,092              | Number of worker-base-year combinations |                                                     |                     |                      | 8,034              |

Results from equation 1 for displacement dummy  $\times$  time dummy interactions and base year task usage interactions with the displacement dummy  $\times$  time dummy interactions. High-tenure workers have a tenure of five or more years, low-tenure workers less than five years. Standard errors in parentheses and clustered at the worker-base-year level. \*\*\*  $p < 0.01$ , \*\*  $p < 0.05$ , \*  $p < 0.1$ . Sample consists of workers who were 20-50 years old in base year (2004-06). The controls include time dummy  $\times$  base-year dummy interactions, other base year plant and worker characteristics interactions with displacement dummy  $\times$  time dummy interactions, year dummies and age, and age squared (not reported).

**Table A10:** Job Loss, Task Usage, and Relative Earnings for High- and Low-Tenure Workers

| High-tenure workers (tenure $\geq$ 5 years) |                      |                                                     |                     |                     |                   | Low-tenure workers (tenure $<$ 5 years) |                                                     |                     |                     |                   |         |
|---------------------------------------------|----------------------|-----------------------------------------------------|---------------------|---------------------|-------------------|-----------------------------------------|-----------------------------------------------------|---------------------|---------------------|-------------------|---------|
| Time                                        | Displaced            | Displacement dummy $\times$ time dummy interactions |                     |                     |                   | Displaced                               | Displacement dummy $\times$ time dummy interactions |                     |                     |                   |         |
|                                             |                      | Routine task usage                                  | Social task usage   | Abstract task usage | Manual task usage |                                         | Routine task usage                                  | Social task usage   | Abstract task usage | Manual task usage |         |
| -5                                          | -0.027**<br>(0.012)  | -0.001<br>(0.004)                                   | -0.003<br>(0.003)   | -0.000<br>(0.005)   | -0.003<br>(0.005) | -0.076**<br>(0.034)                     | -0.003<br>(0.007)                                   | 0.005<br>(0.006)    | -0.004<br>(0.007)   | -0.013<br>(0.010) |         |
| -4                                          | -0.018<br>(0.012)    | 0.002<br>(0.004)                                    | -0.000<br>(0.003)   | 0.001<br>(0.005)    | -0.002<br>(0.005) | 0.071**<br>(0.034)                      | -0.003<br>(0.007)                                   | 0.004<br>(0.006)    | -0.006<br>(0.007)   | -0.014<br>(0.010) |         |
| -3                                          | -0.010<br>(0.012)    | 0.000<br>(0.004)                                    | 0.001<br>(0.003)    | -0.001<br>(0.005)   | 0.001<br>(0.005)  | 0.087***<br>(0.034)                     | -0.001<br>(0.007)                                   | 0.003<br>(0.006)    | -0.003<br>(0.007)   | -0.007<br>(0.010) |         |
| -2                                          | -0.015<br>(0.012)    | -0.001<br>(0.004)                                   | -0.001<br>(0.003)   | -0.001<br>(0.005)   | 0.002<br>(0.005)  | 0.003<br>(0.034)                        | -0.000<br>(0.007)                                   | 0.001<br>(0.006)    | -0.001<br>(0.007)   | -0.000<br>(0.010) |         |
| 0                                           | -0.001<br>(0.012)    | -0.004<br>(0.004)                                   | -0.000<br>(0.003)   | 0.004<br>(0.005)    | -0.000<br>(0.005) | -0.021<br>(0.034)                       | 0.001<br>(0.007)                                    | 0.002<br>(0.006)    | 0.004<br>(0.007)    | 0.001<br>(0.010)  |         |
| 1                                           | -0.010<br>(0.012)    | -0.008*<br>(0.004)                                  | 0.018***<br>(0.003) | 0.007<br>(0.005)    | 0.002<br>(0.005)  | -0.031<br>(0.034)                       | -0.005<br>(0.007)                                   | 0.010<br>(0.006)    | 0.003<br>(0.007)    | 0.002<br>(0.010)  |         |
| 2                                           | -0.029**<br>(0.012)  | -0.017***<br>(0.004)                                | 0.039***<br>(0.003) | 0.006<br>(0.005)    | 0.003<br>(0.005)  | -0.075**<br>(0.034)                     | -0.015**<br>(0.007)                                 | 0.025***<br>(0.006) | -0.006<br>(0.007)   | -0.001<br>(0.010) |         |
| 3                                           | -0.019<br>(0.012)    | -0.017***<br>(0.004)                                | 0.034***<br>(0.003) | 0.003<br>(0.005)    | 0.010*<br>(0.005) | -0.066*<br>(0.034)                      | -0.014**<br>(0.007)                                 | 0.021***<br>(0.006) | -0.009<br>(0.007)   | -0.008<br>(0.010) |         |
| 4                                           | -0.008<br>(0.012)    | -0.014***<br>(0.004)                                | 0.034***<br>(0.003) | 0.008<br>(0.005)    | 0.008<br>(0.005)  | -0.085**<br>(0.034)                     | -0.011<br>(0.007)                                   | 0.028***<br>(0.006) | -0.004<br>(0.007)   | -0.009<br>(0.010) |         |
| 5                                           | -0.015<br>(0.012)    | -0.018***<br>(0.004)                                | 0.031***<br>(0.003) | 0.008*<br>(0.005)   | 0.004<br>(0.005)  | -0.106***<br>(0.034)                    | -0.011<br>(0.007)                                   | 0.030***<br>(0.006) | -0.001<br>(0.007)   | -0.006<br>(0.010) |         |
| 6                                           | -0.011<br>(0.012)    | -0.017***<br>(0.004)                                | 0.028***<br>(0.003) | 0.008*<br>(0.005)   | -0.003<br>(0.005) | -0.143***<br>(0.034)                    | -0.008<br>(0.007)                                   | 0.031***<br>(0.006) | -0.005<br>(0.007)   | -0.005<br>(0.010) |         |
| 7                                           | -0.023*<br>(0.012)   | -0.015***<br>(0.004)                                | 0.023***<br>(0.003) | 0.007<br>(0.005)    | -0.001<br>(0.005) | -0.145***<br>(0.034)                    | -0.013*<br>(0.007)                                  | 0.032***<br>(0.006) | -0.003<br>(0.007)   | 0.004<br>(0.010)  |         |
| 8                                           | -0.038***<br>(0.012) | -0.012***<br>(0.004)                                | 0.016***<br>(0.003) | 0.008<br>(0.005)    | 0.001<br>(0.005)  | -0.155***<br>(0.034)                    | -0.015**<br>(0.007)                                 | 0.038***<br>(0.006) | -0.003<br>(0.007)   | 0.004<br>(0.010)  |         |
| 9                                           | -0.049***<br>(0.012) | -0.007*<br>(0.004)                                  | 0.015***<br>(0.003) | 0.007<br>(0.005)    | 0.001<br>(0.005)  | -0.125***<br>(0.034)                    | -0.012*<br>(0.007)                                  | 0.027***<br>(0.006) | -0.003<br>(0.007)   | -0.011<br>(0.010) |         |
| 10                                          | -0.050***<br>(0.012) | -0.007*<br>(0.004)                                  | 0.012***<br>(0.003) | 0.007<br>(0.005)    | 0.000<br>(0.005)  | -0.134***<br>(0.034)                    | -0.007<br>(0.007)                                   | 0.034***<br>(0.006) | -0.002<br>(0.007)   | -0.012<br>(0.010) |         |
| Observations                                |                      |                                                     |                     |                     | 208,502           | Observations                            |                                                     |                     |                     |                   | 127,861 |
| Number of worker-base-year combinations     |                      |                                                     |                     |                     | 13,092            | Number of worker-base-year combinations |                                                     |                     |                     |                   | 8,034   |

Results from equation 1 for displacement dummy  $\times$  time dummy interactions and base year task usage interactions with the displacement dummy  $\times$  time dummy interactions. High-tenure workers have a tenure of five or more years, low-tenure workers less than five years. Earnings for those not employed in a given year  $t$  are coded to be missing. Standard errors in parentheses and clustered at the worker-base-year level. \*\*\*  $p < 0.01$ , \*\*  $p < 0.05$ , \*  $p < 0.1$ . Sample consists of workers who were 20-50 years old in base year (2004-06). The controls include time dummy  $\times$  base-year dummy interactions, other base year plant and worker characteristics interactions with displacement dummy  $\times$  time dummy interactions, year dummies and age, and age squared (not reported).

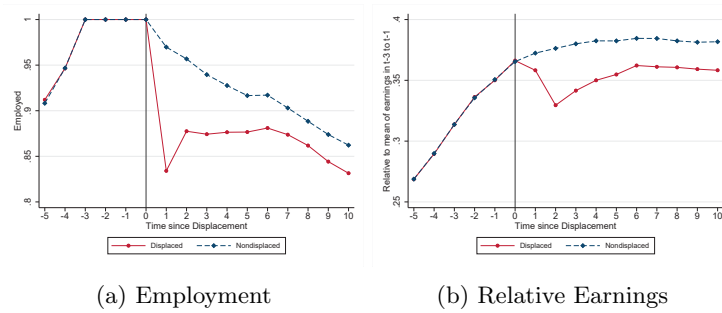

**Fig. A1:** Labour Market Outcomes by Displacement Status. Solid lines describe the outcomes for displaced workers. Dashed lines are the outcomes of non-displaced workers.

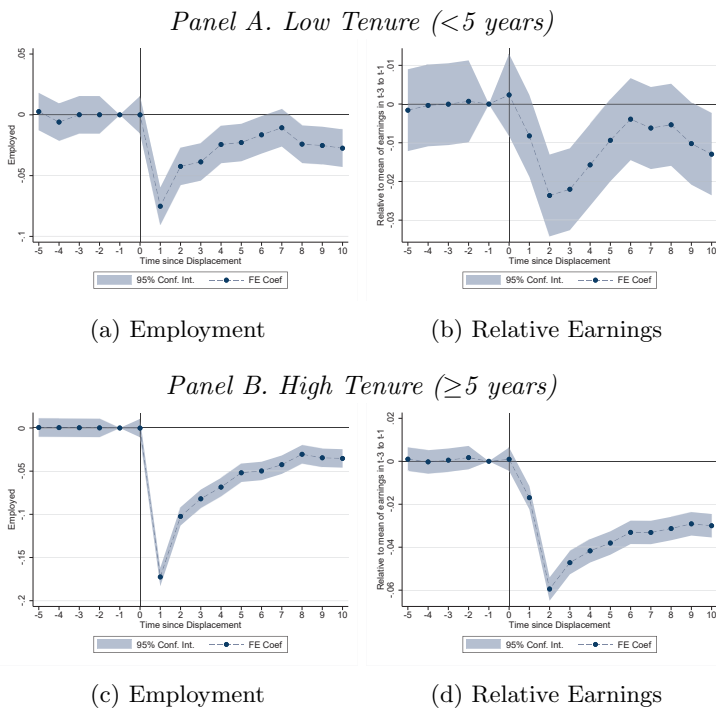

**Fig. A2:** Job Loss and Labor Market Outcomes by Tenure

## Panel A. Employment

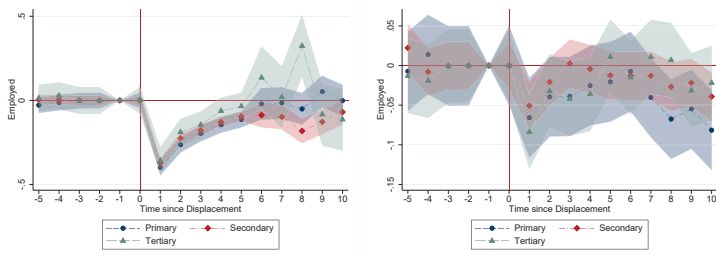

(a) Routine-intensive workers

(b) Social-intensive workers

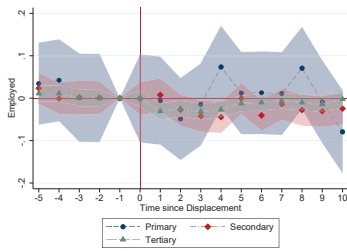

(c) Abstract-intensive workers

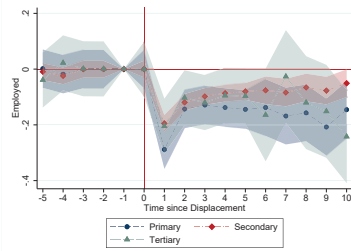

(d) Manual-intensive workers

## Panel B. Relative Earnings

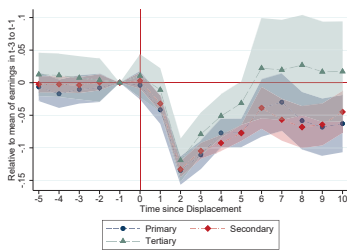

(e) Routine-intensive workers

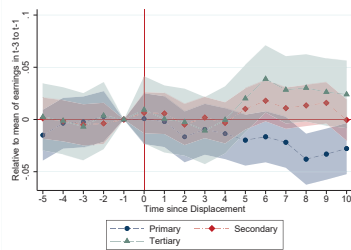

(f) Social-intensive workers

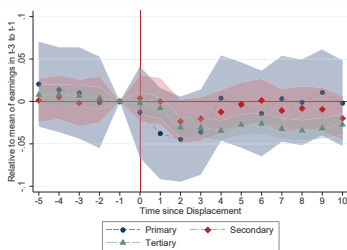

(g) Abstract-intensive workers

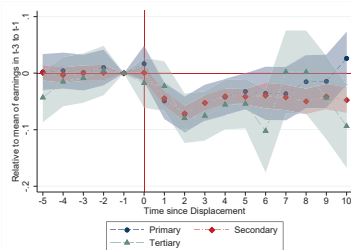

(h) Manual-intensive workers

**Fig. A3:** Job Loss and Labor Market Outcomes by Task Usage Category and Education

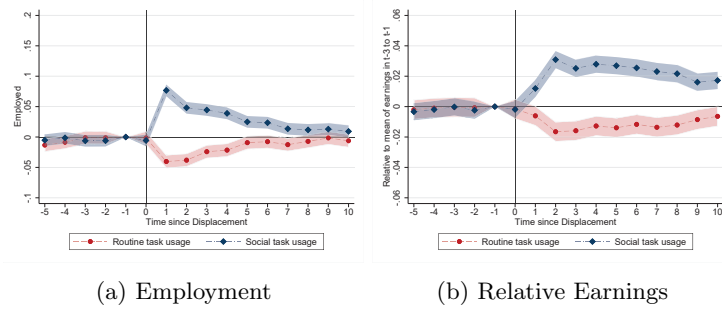

(a) Employment

(b) Relative Earnings

**Fig. A4:** Job Loss, Task Usage, and Labor Market Outcomes for Displaced Workers with Plant Fixed Effects

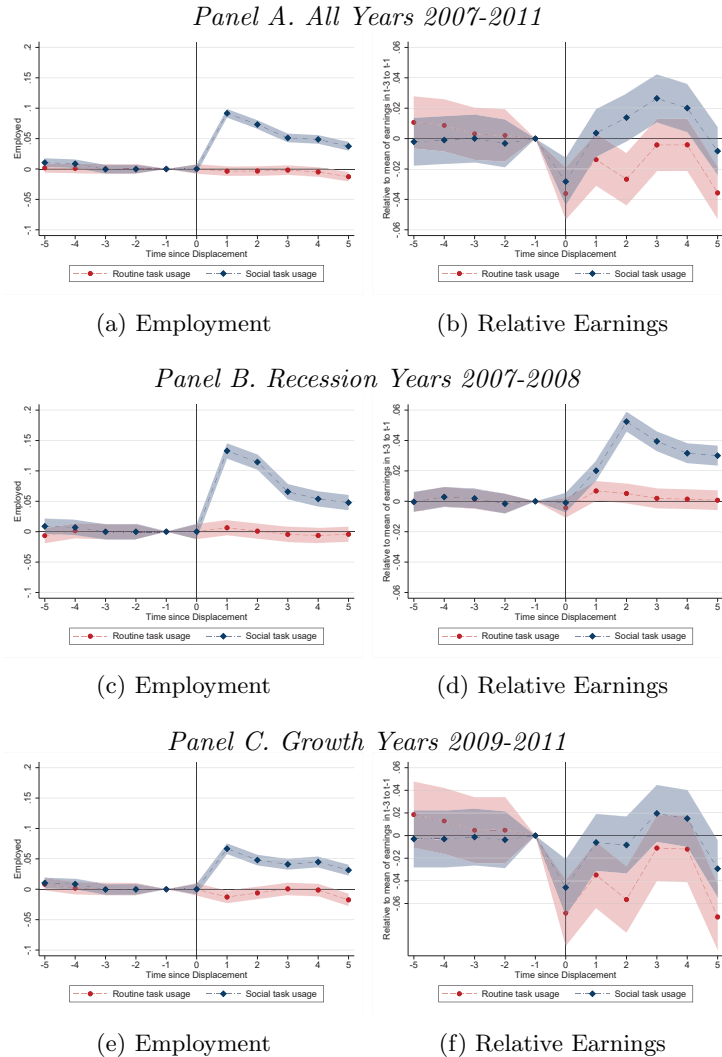

**Fig. A5:** Job Loss, Task Usage, and Labor Market Outcomes for Base Years 2007-2011

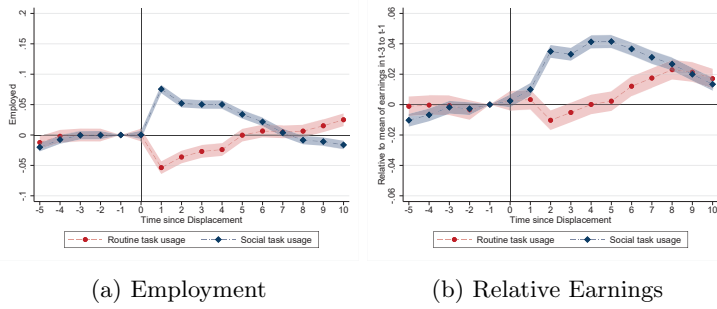

**Fig. A6:** Job Loss, Task Usage, and Labor Market Outcomes for Mass Layoff Sample
